# Supplementary material for: In-plane stimulated emission of polycrystalline CH3NH3PbBr3 perovskite thin films
Source: Royal Society of Chemistry journal article supplement (doi:10.1039/c9ra08619f), 2020-01-01
Supplement: c9ra08619f3.pdf [file c9ra08619f3.pdf]

# In-plane stimulated emission of polycrystalline $CH_3NH_3PbBr_3$ perovskite thin films

Ju Wang,<sup>a</sup> Wei Liu,<sup>a</sup> Cuncun Wu,<sup>a</sup> Ning Zhu,<sup>a</sup> Congyue Liu,<sup>a</sup> Shufeng Wang,<sup>\*a,b,c</sup>

## List

## Videos

Images of  $MAPbBr_3$  thin films under various excitation intensity

Images of  $MAPbBr_3$  thin films under different excitation polarization

## Additional figures

Figure S1

Figure S2

Figure S3

Figure S4

---

<sup>a</sup> State Key Laboratory for Artificial Microstructure and Mesoscopic Physics,

Department of Physics, Peking University, Beijing 100871, China

<sup>b</sup> Collaborative Innovation Center of Extreme Optics, Shanxi University, Taiyuan,

Shanxi 030006, China

<sup>c</sup> Frontiers Science Center for Nano-optoelectronics, Peking University, Beijing

100871, China

† Electronic Supplementary Information (ESI) available: graphs and videos to verify spectroscopic properties of different sample.

## Additional figures

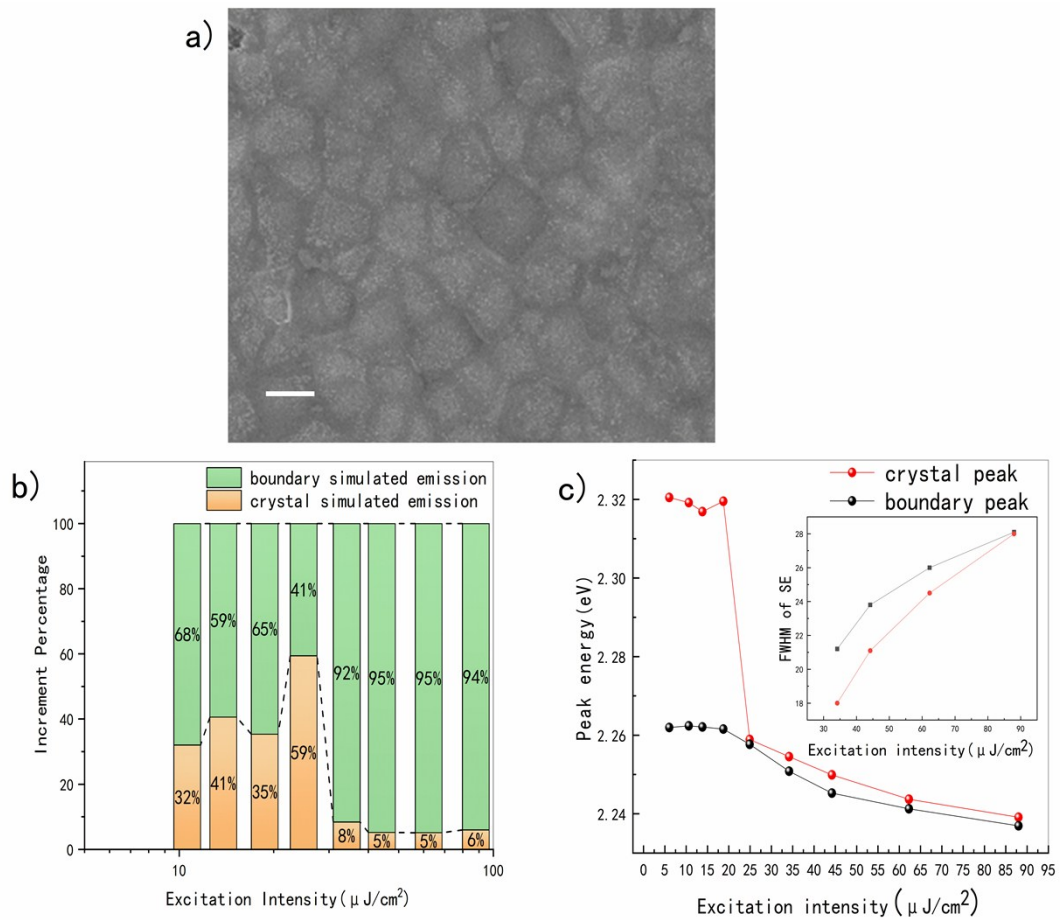

**Figure S1.** (a) SEM images of  $\text{MAPbBr}_3$  thin film. Scalebar  $10 \mu\text{m}$ . (b) SE intensity increment at boundaries and inside grains. (c) Peak energy and FWHM of inside grains and boundaries.

SEM image shows the grains in  $\text{MAPbBr}_3$  thin films averages about  $10 \mu\text{m}$ , and boundaries are quite dim due to the tightly arrangement of grains. We compare the SE increment at boundary (green) and inside (yellow). Considering the luminescent flux reflects the collection of excited particles, the result shows nine tenth of newly added stimulated emission tend to gather and scatter from boundaries when excited above the threshold. Also, SE emissions at boundaries is red-shift and broadened a little in peak energy and FWHM compared with inside of crystal.

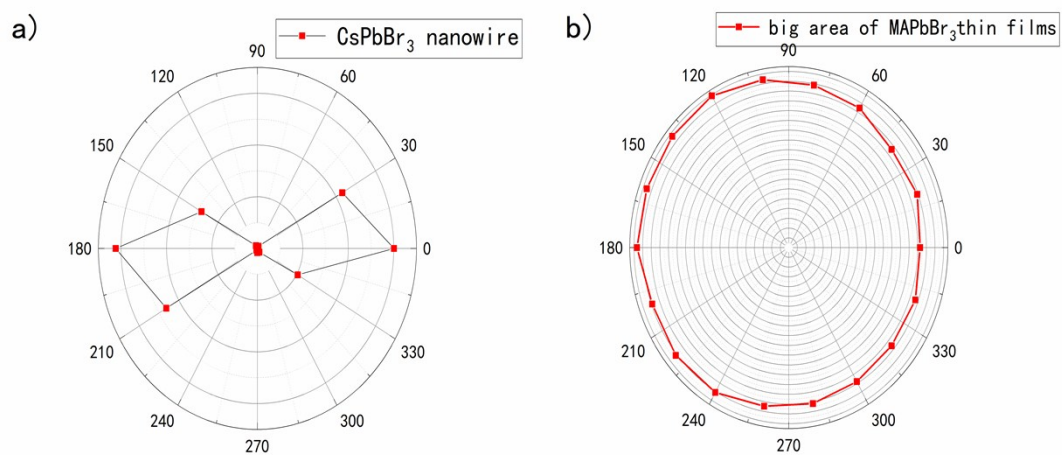

**Figure S2.** (a) Polarization of a nanowire under  $44.2 \mu\text{J}/\text{cm}^2$  excitation. (b) Polarization of large area of MAPb<sup>Br<sub>3</sub></sup> thin films under  $44.2 \mu\text{J}/\text{cm}^2$  excitation.

CsPb<sup>Br<sub>3</sub></sup> nanowires show a clearly linear polarization under  $44.2 \mu\text{J}/\text{cm}^2$  excitation, which means its emission will be greatly modulated by the excitation polarization. Using the same system, a large area of  $160 \mu\text{m}$  in MAPb<sup>Br<sub>3</sub></sup> thin films shows no polarization, since a large cluster of grains and polycrystalline have no uniform orientation.

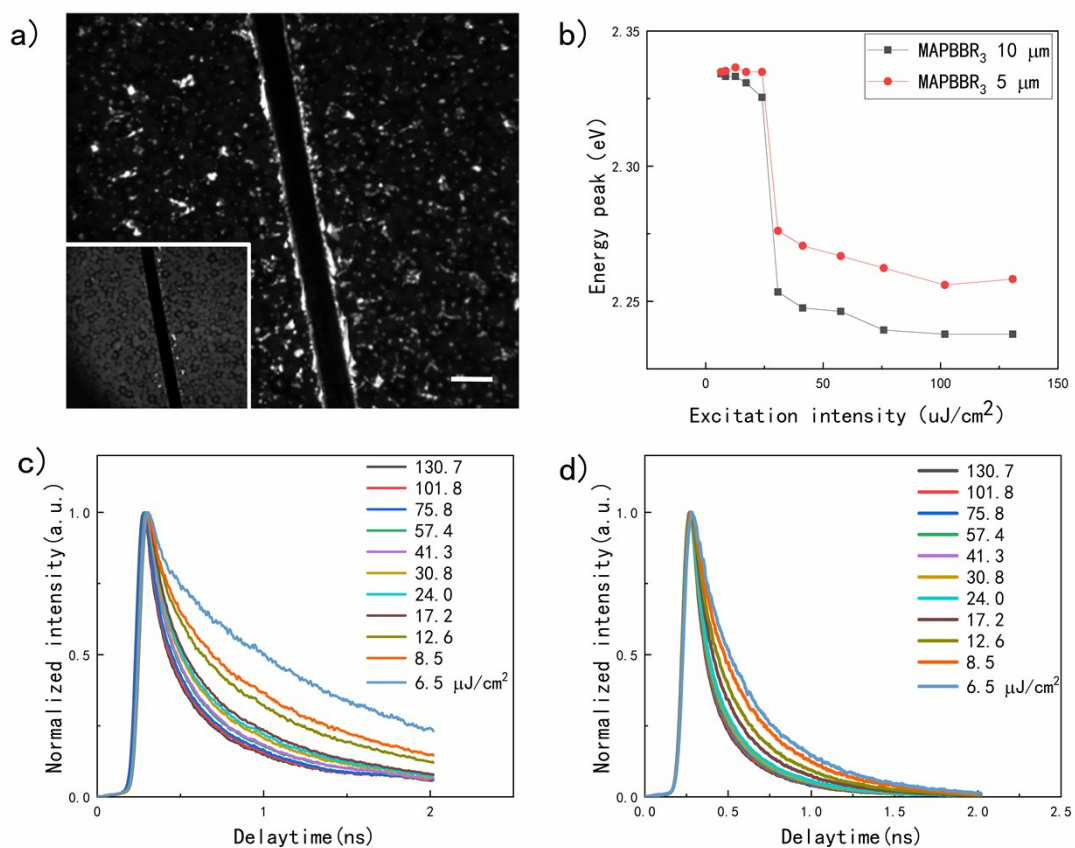

**Figure S3.** (a) Emission behavior in MAPb<sup>Br</sup><sub>3</sub> thin films with 5 μm grains. Scalebar 10 μm. (b) Peak energy under various excitation. (c), (d) Fluorescence lifetimes in MAPb<sup>Br</sup><sub>3</sub> thin films with 10 μm and 5 μm grains.

A shining edge can also be seen in MAPb<sup>Br</sup><sub>3</sub> thin films with smaller grains (5 μm), but less bright compared to the larger ones. A blue-shifted peak energy and a shortened lifetime of SE are also observed.

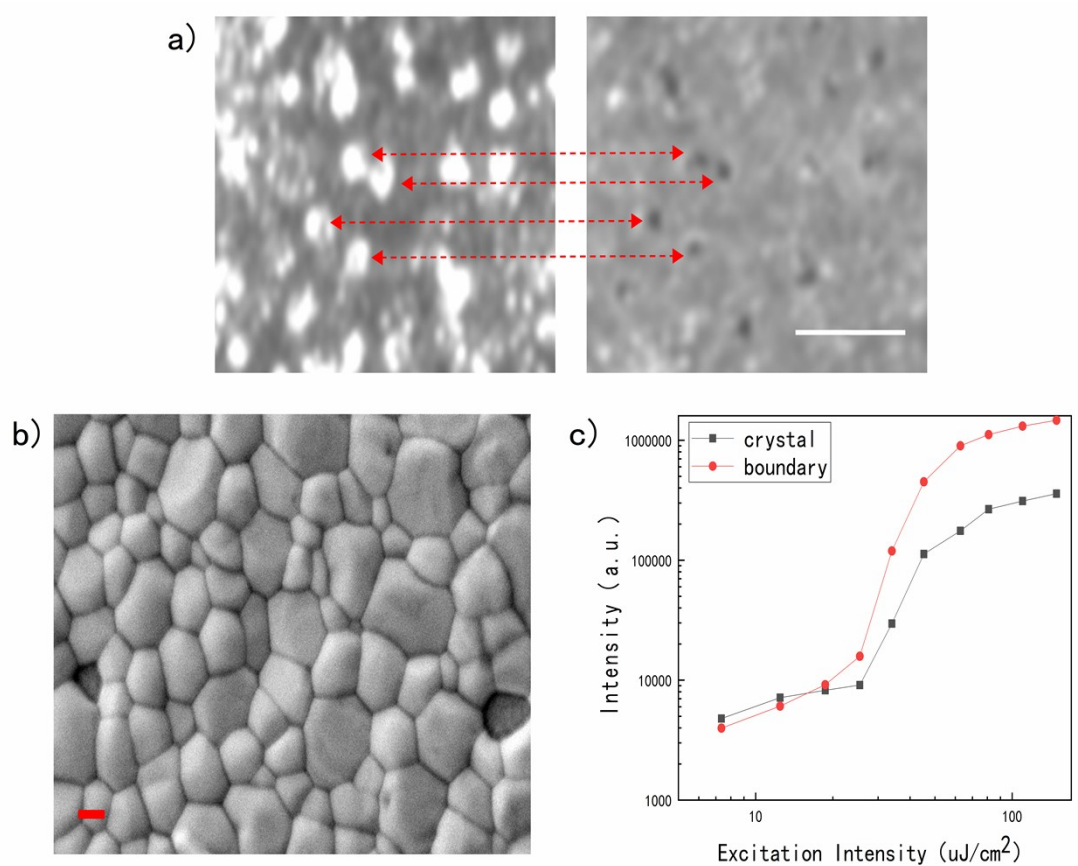

**Figure S4.** (a) Fluorescence image of FAPb<sup>Br</sup><sub>3</sub> thin films under the excitation of 8.09 μJ/cm<sup>2</sup> (left) and 12.4 μJ/cm<sup>2</sup> (right). Scalebar 10 μm. (b) SEM image of FAPb<sup>Br</sup><sub>3</sub> thin films. Scalebar 200 nm. (c) Power law relations at the inner part and voids.

Fluorescence below and above threshold SEM images of FAPb<sup>Br</sup><sub>3</sub> thin films shows that SE scatter a lot from naturally formed voids and defects. SEM image presents a clear crystalline of 1 μm and below. Power law using the same set-up shows that emission at voids and inside shows a smaller gap, which can be attributed to the absence of effective propagation and amplification of SE.
